1  
2  
3  
4  
5  
6  
7  
8  
9  
10  
11  
12  
13  
14  
15  
16  
17  
18  
19  
20  
21  
22  
23  
24  
25  
26  
27  
28  
29

**Vaccine-elicited murine antibody WS6 neutralizes  
diverse beta-coronaviruses by recognizing a  
helical stem supersite of vulnerability**

Wei Shi<sup>1,3</sup>, Lingshu Wang<sup>1,3</sup>, Tongqing Zhou<sup>1,3</sup>, Mallika Sastry<sup>1</sup>, Eun Sung Yang<sup>1</sup>, Yi Zhang<sup>1</sup>, Man Chen<sup>1</sup>, Xuejun Chen<sup>1</sup>, Misook Choe<sup>1</sup>, Adrian Creanga<sup>1</sup>, Kwan Leung<sup>1</sup>, Adam S. Olia<sup>1</sup>, Amarendra Pegu<sup>1</sup>, Reda Rawi<sup>1</sup>, Chen-Hsiang Shen<sup>1</sup>, Erik-Stephane D. Stancofski<sup>1</sup>, Chloe Adrienna Talana<sup>1</sup>, I-Ting Teng<sup>1</sup>, Shuishu Wang<sup>1</sup>, Kizzmekia S. Corbett<sup>1</sup>, Yaroslav Tsybovsky<sup>2</sup>, John R. Mascola<sup>1\*</sup>, Peter D. Kwong<sup>1,4\*</sup>

<sup>1</sup> Vaccine Research Center, National Institute of Allergy and Infectious Diseases, National Institutes of Health, Bethesda, MD 20892, USA

<sup>2</sup> Electron Microscopy Laboratory, Cancer Research Technology Program, Leidos Biomedical Research, Inc., Frederick National Laboratory for Cancer Research, Frederick, MD 21702, USA.

<sup>3</sup> These authors contributed equally

<sup>4</sup> Lead Contact

\* Correspondence: [jmascola@nih.gov](mailto:jmascola@nih.gov) (J.R.M.), [pdkwong@nih.gov](mailto:pdkwong@nih.gov) (P.D.K.)

Keywords: beta-coronavirus, broadly neutralizing antibody, COVID-19, crystal structure, SARS-CoV-2, S2-directed antibody, vaccine design

30  
31  
32  
33  
34  
35  
36  
37  
38  
39  
40  
41  
42  
43  
44  
45  
46  
47

### **Summary**

Immunization with SARS-CoV-2 spike elicits diverse antibodies, but can any of these neutralize broadly? Here, we report the isolation and characterization of antibody WS6, from a mouse immunized with mRNA encoding the SARS-CoV-2 spike. WS6 bound diverse beta-coronavirus spikes and neutralized SARS-CoV-2 variants, SARS-CoV, and related sarbecoviruses. Epitope mapping revealed WS6 to target a region in the S2 subunit, which was conserved among SARS-CoV-2, MERS-CoV, and hCoV-OC43. The crystal structure at 2-Å resolution of WS6 with its S2 epitope revealed recognition to center on a conserved helix, which was occluded in both prefusion and post-fusion spike conformations. Structural and neutralization analyses indicated WS6 to neutralize by inhibiting fusion, post-viral attachment. Comparison of WS6 to other antibodies recently identified from convalescent donors or mice immunized with diverse spikes indicated a stem-helical supersite – centered on hydrophobic residues Phe1148, Leu1152, Tyr1155, and Phe1156 – to be a promising target for vaccine design.

48 **Highlights**

- 49 • SARS-CoV-2 spike mRNA-immunized mouse elicited an antibody, WS6, that cross  
50 reacts with spikes of diverse human and bat beta-coronaviruses
- 51 • WS6 neutralizes SARS-CoV-2 variants, SARS-CoV, and related viruses
- 52 • Crystal structure at 2-Å resolution of WS6 in complex with a conserved S2 peptide  
53 reveals recognition of a helical epitope
- 54 • WS6 neutralizes by inhibition of fusion, post-viral attachment
- 55 • WS6 recognizes a supersite of vulnerability also recognized by other recently identified  
56 antibodies
- 57 • Helical supersite of vulnerability comprises a hydrophobic cluster spanning three  
58 helical turns, with acid residues framing the center turn
- 59 • Genetic and structural analysis indicate supersite recognition to be compatible with  
60 diverse antibody ontogenies

61

62

## 63 **Introduction**

64           The COVID-19 pandemic, resulting from the zoonotic infection of severe acute respiratory  
65 syndrome coronavirus 2 (SARS-CoV-2), continues to rage on, fueled by continuously evolving  
66 variants, which are making current licensed vaccines less effective (Araf et al., 2022; Doria-Rose  
67 et al., 2021; Edara et al., 2021; Garcia-Beltran et al., 2022; Liu et al., 2021). Vaccines capable of  
68 neutralizing all SARS-CoV-2 variants for the foreseeable future are of high interest. Antibodies  
69 with broad neutralizing capacity are also of interest: if ultrapotent, they might be useful as  
70 therapeutic antibodies; but even if only moderate potency, their epitopes are useful as vaccine  
71 templates (Kong et al., 2016).

72           Virtually all neutralizing antibodies are directed against the trimeric ectodomain of the  
73 spike glycoprotein, which comprises two subunits S1 and S2. Neutralizing antibodies isolated from  
74 COVID-19 convalescent donors or from vaccinees after spike immunization are directed primarily  
75 against the N-terminal domain (NTD) or receptor-binding domain (RBD) on the S1 subunit of the  
76 trimeric viral surface spike glycoprotein (Spike) (Barnes et al., 2020; Brouwer et al., 2020; Cao et  
77 al., 2020; Cerutti et al., 2021; Ju et al., 2020; Liu et al., 2020; McCallum et al., 2021; Robbiani et  
78 al., 2020; Rogers et al., 2020; Seydoux et al., 2020; Suryadevara et al., 2021; Zost et al., 2020).  
79 Evolving SARS-CoV-2 variants, such as Delta and Omicron, evade these antibodies by mutations  
80 that reduce or knockout antibody binding, but maintain or even enhance infectivity (Garcia-Beltran  
81 et al., 2022; Liu et al., 2021; Sievers et al., 2022; Syed et al., 2022). Antibodies against most other  
82 regions on the spike are generally poorly neutralizing to non-neutralizing; several antibodies,  
83 however, such as antibody S2P6 (Pinto et al., 2021) have been reported to neutralize diverse  
84 strains of beta coronaviruses through recognition of a stem-helix supersite of vulnerability in the  
85 S2 subunit (Hsieh et al., 2021; Li et al., 2022; Sauer et al., 2021; Zhou et al., 2021).

86 To investigate the breadth of neutralizing antibodies obtained from mice vaccinated by  
87 mRNA encoding the SARS-CoV-2 spike, we assessed monoclonal antibodies for the location of  
88 their epitopes, the breadth of their binding to diverse spikes, and their neutralization capacities. We  
89 found one, antibody WS6, with broad binding capacity and moderate neutralization potency, and  
90 we determined its crystal structure in complex with its epitope, the step in the entry pathway where  
91 it neutralized, and how its recognition compared with other recently identified antibodies with  
92 overlapping epitopes. The results reveal a highly promising vaccine target in the S2 subunit –  
93 comprising a hydrophobic cluster spanning three helical turns, with acidic residues framing its  
94 center turn – and add WS6 to the panel of antibodies by which to guide its vaccine development.

95

## 96 **Results**

### 97 **Identification and characterization of SARS-CoV-2 spike-specific antibodies from** 98 **immunized mice**

99 To obtain antibodies specific for SARS-CoV-2 spike glycoprotein, we immunized mice  
100 with mRNA coding for SARS-CoV-2 spike (**Figure 1A**). To generate hybridomas, we boosted  
101 with soluble spike protein and after three days generated hybridomas by fusing splenocyte B cells  
102 with Sp2/0 cells from the mouse with the highest plasma neutralization titers to SARS-CoV-2.  
103 Eleven monoclonal antibodies, named WS1 to WS11, bound SARS-CoV-2 S-dTM by ELISA  
104 (**Figure 1B**). Nine of these bound the S1 subunit, either S1-short1 (spike residues 1-670) or S1R  
105 (residues 1-537). Six of them, WS1, WS2, WS3, WS7, WS8, and WS10, bound NTD; and three of  
106 them, WS4, WS9, and WS11, bound RBD. Antibodies WS5 and WS6, however, did not bind  
107 NTD, RBD, or S1, and their binding epitopes were presumably on the S2 subunit of the spike.

108 To provide insight into the breadth of binding, we assessed recognition of WS1-11 on a  
109 panel of prefusion-stabilized diverse beta-coronavirus spikes (S2Ps) (Wrapp et al., 2020).  
110 Detectable binding was observed against SARS-CoV-2, SARS-CoV, MERS-CoV and hCoV-  
111 HKU1 for five antibodies (**Figure 1C**). For antibodies WS3, WS4, and WS7, binding was more  
112 than 1,000-times weaker against the divergent strain versus that of the immunogen. However, for  
113 antibodies WS5 and WS6, binding was only about 10-fold reduced versus SARS-CoV-2.  
114 Neutralization assessments revealed that WS5 neutralized neither SARS-CoV-2 nor SARS-CoV,  
115 whereas WS6 could neutralize both (**Figure 1D**). WS6 was further studied for its epitope and  
116 neutralization activities.

117

118 **WS6 recognizes diverse beta-coronaviruses spikes and neutralizes SARS-CoV-2 and**  
119 **variants, SARS-CoV, and related viruses from bat, pangolin, and other animals**

120 To assess fully the broad reactivity of WS6, we performed ELISAs against S2Ps from an  
121 even more divergent panel of coronaviruses, including RaTG13, WIV1, SHC014, hCoV-OC43,  
122 and hCoV-229E (**Figure 2A**). Remarkably, WS6 was able to bind all beta-coronaviruses tested,  
123 though not to the alpha-coronavirus hCoV-229E (**Figure S1**). The apparent binding affinities of  
124 WS6 to S2Ps, measured by biolayer interferometry (BLI), showed nanomolar or lower dissociation  
125 constants ( $K_{DS}$ ), with slow dissociation such that  $k_{off}$  values could not be determined accurately in  
126 many cases (**Figure 2B**). To determine if WS6 could bind spike proteins on cell surface, we  
127 expressed spikes of SARS-CoV-2, SARS-CoV, MERS-CoV, hCoV-HKU1, and hCoV-OC43 on  
128 the surface of Expi-293 cells and analyzed WS6 binding by flow cytometry. We found that WS6  
129 bound well to the cell surface expressing the beta-coronavirus spikes (**Figures 2C and S2**).

130 To determine if the broad recognition of WS6 for spikes translated into broad neutralization  
131 of beta-coronaviruses, we assessed its neutralization activities by pseudovirus neutralization assays  
132 (Naldini et al., 1996; Wang et al., 2021). WS6 neutralized all tested variants of SARS-CoV-2  
133 including Omicron (B.1.1.529), with  $IC_{50}$  2.46-26.52  $\mu\text{g/ml}$  (**Figures 2D and S3; Table S1**). WS6  
134 could also neutralize beta-coronaviruses related to SARS-CoV-2 (such as RaTG13, Pangolin\_GD,  
135 and Pangolin\_GX), SARS-CoV, and related viruses Frankfurt1, Civet007-2004, WIV1, and  
136 SHC014 with  $IC_{50}$  0.11-4.91  $\mu\text{g/ml}$  (**Figures 2D and S3; Table S1**). WS6 also neutralized related  
137 beta-coronaviruses, such as RaTG13, Pangolin-GX, Civet007-2004, and SHC014, with sub  
138 micromolar  $IC_{50}$ , better than against SARS-CoV-2 despite being elicited by immunizations with  
139 SARS-CoV-2 spike. The only tested beta-coronavirus strain WS6 failed to neutralize was MERS-  
140 CoV, consistent with its lower ELISA binding to this strain (**Table S1**).

141

#### 142 **WS6 epitope mapping**

143 We attempted to map the epitope of WS6 by visualizing its recognition of the spike  
144 ectodomain by negative stain-electron microscopy (EM). 2D-classification of antigen-binding  
145 fragment (Fab) of WS6 in complex with the S2P spike (WA-1 strain) showed generally unbound  
146 spikes, with only 4% of the images yielding a trimer with Fabs binding in the membrane-proximal  
147 S2 stem (**Figure 3A**). We also analyzed Fab WS6 in complex with spike S2 subunit; 2D-  
148 classification indicated WS6 to bind S2, though most of S2 appeared to be disordered (**Figure 3B**).

149 To further map the epitope, we performed peptide array-based epitope mapping and  
150 identified a 17-residue peptide, PELDSFKEELDKYFKNH (SARS-CoV-2 spike residues 1143-  
151 1159) to bind WS6 (**Figure 3C**), suggesting WS6 epitope to be at the S2 stem-helix region of the  
152 spike near the viral membrane, consistent with our negative stain-EM observation. This peptide is

153 conserved among SARS-CoV, SARS-CoV-2, and RaTG13, and is mostly conserved among  
154 diverse beta-coronaviruses (**Figure S4A**).

155

### 156 **Crystal structure of WS6 in complex with a conserved S2 peptide**

157 To elucidate the mechanism for the broad reactivity of WS6, we determined a crystal  
158 structure at 2 Å of Fab WS6 in complex with peptide Ace-F<sub>1148</sub>KEELDKYFK<sub>1157</sub>-PEG12-Lys-  
159 Biotin (residue numbers were based on the SARS-CoV-2 spike sequence) (**Figure 3D and Table**  
160 **S2**). The peptide contained a 10-residue segment conserved among beta-coronaviruses (**Figure S4A**)  
161 and was acetylated at N terminus and biotin-pegylated at C terminus. Well-defined electron density  
162 was observed for the entire WS6 Fab and for the entire peptide, including the acetyl group at the N  
163 terminus and part of the polyethylene glycol at the C terminus (**Figure 3D**). Peptide binding  
164 interactions involved both heavy and light chains, with heavy chain contributing ~360 Å<sup>2</sup> buried  
165 surface area (BSA) and light chain contributing ~230 Å<sup>2</sup> (**Table S3**). The BSA of the peptide was  
166 slightly larger at ~675 Å<sup>2</sup>, not counting the BSA of the visible PEG fragment (~100 Å<sup>2</sup> total). This  
167 binding interface is smaller than a typical antibody-binding epitope, indicating the full WS6 epitope  
168 to likely involve additional residues.

169 All complementarity-determining regions (CDRs) of both heavy and light chains were  
170 involved in binding, creating a groove that cradled the epitope (**Figure 3D**). In the WS6-bound  
171 crystal structure, the S2 epitope formed a three-turn α helix; examination of its binding mode  
172 revealed binding for a longer helix with extensions on both termini without any major clashes. Most  
173 of the residues of the peptide involved in binding, except for Glu1150 and Lys1154, which were on  
174 the side of the helix facing WS6 (**Figure 3E**). Aromatic or hydrophobic residues, Phe1148,  
175 Leu1152, Tyr1155, and Phe1156, were on the side of the helix facing WS6. Phe1148 had aromatic



176 interactions with Arg50<sub>L</sub> and Tyr91<sub>L</sub> of WS6 light chain and hydrophobic interactions with Ser97<sub>H</sub>  
177 of heavy chain. Tyr1155 side chain stuck into a cavity formed by CDR L3 from Tyr91<sub>L</sub> to Pro96<sub>L</sub> and  
178 had aromatic or hydrophobic interactions with side chains of Tyr91<sub>L</sub>, Tyr94<sub>L</sub>, and Pro96<sub>L</sub> and the  
179 peptide backbone. Leu1152 and Phe1156 side chains bound in a pocket between heavy and light  
180 chains and interacted with side chains of Tyr91<sub>L</sub>, Pro96<sub>L</sub>, Phe99<sub>H</sub>, Thr95<sub>H</sub>, Trp33<sub>H</sub>, His35<sub>H</sub>, and  
181 Tyr47<sub>H</sub> (**Figure 3E and 3F and Table S3**).

182

### 183 **WS6 neutralizes by inhibition of fusion steps post viral attachment**

184 To elucidate the mechanism by which WS6 neutralize beta-coronaviruses, we incubated  
185 BHK21-ACE2 cells with SARS-CoV-2 spike pseudotyped lentivirus on ice to allow virus to attach  
186 to ACE2. After thorough washing, cells were incubated with WS6 or WS4 on ice for one hour and at  
187 37 °C for 72 hours. WS4, an RBD-directed neutralizing antibody, could neutralize not more than  
188 40% of the virus, whereas WS6 had no problem neutralizing the ACE2 pre-attached virus (**Figure**  
189 **4A**). We performed a similar experiment using 293 flpin-TMPRSS2-ACE2 cells for WS6 and S2P6  
190 (Pinto et al., 2021), which also binds to the S2-stem helix, and found that both antibodies could  
191 neutralize ACE2 pre-attached virus. These results suggest that WS6 is likely to neutralize SARS-  
192 CoV-2 by engaging in steps post-viral attachment to ACE2.

193 As described above in the structural analysis, WS6 recognized the hydrophobic face of the  
194 stem helix with residues Phe1148, Leu1152, Tyr1155, and Phe1156 binding in the center of the  
195 paratope groove. In the prefusion structure of SARS-CoV-2 spike (PDB: 6xr8) (Cai et al., 2020; Ke  
196 et al., 2020), these hydrophobic side chains pack in the coiled-coil interface of the 3-helical bundle.  
197 Modeling of WS6 binding to the prefusion SARS-CoV-2 spike, based on the WS6-peptide complex,  
198 revealed substantial clashes (**Figure 4B, left panel**), indicating that WS6 binding would require

199 unpacking or disassembly of the helical bundle. Similarly, the postfusion spike structure (PDB: 6xra)  
200 (Cai et al., 2020) was incompatible with binding of WS6 to the hydrophobic side of the peptide helix  
201 as revealed by the crystal structure, because these hydrophobic residues are involved in the packing  
202 of the small helix with the central coiled coil in the postfusion structure (**Figure 4B, right panel**).  
203 Because the spike binding to the receptor and transitioning from the prefusion conformation to  
204 postfusion conformation drive the membrane fusion process, WS6 maybe even more apt to bind  
205 during this conformational transition and inhibit the fusion process (**Figure 4C**).

206

### 207 **A helical stem supersite of vulnerability**

208         Several broad beta-coronavirus-neutralizing antibodies have been identified recently that  
209 target the S2 stem-helix region, including the afore mentioned S2P6 (Pinto et al., 2021) as well as  
210 antibodies B6 (Sauer et al., 2021), IgG22 (Hsieh et al., 2021), CCP40.8 (Zhou et al., 2021), and  
211 CV3-25 (Li et al., 2022). Superposition of their S2 helical epitopes indicated these antibodies to  
212 bind to the stem helix with varying orientations (**Figure 5A**) and to target different sets of residues  
213 ranging from residue position 1142 to 1164 on S2 (**Figures 5B and S5**). Epitope analysis indicated  
214 a common subset of residues, namely Phe1148, Lys1149, Glu1153, Leu1152, Asp1153, Tyr1155,  
215 and Phe1156, to interact with four of the six antibodies (**Figure 5B, left**). These residues, which  
216 spanned three helical turns on S2 with a central hydrophobic cluster sandwiched by hydrophilic  
217 residues Lys1149, Glu1151, and Asp1153, formed a supersite of vulnerability for antibody  
218 recognition (**Figure 5B, middle and right**). Sequence analysis indicated this S2 supersite to be  
219 highly conserved among beta-coronaviruses (**Figure 5C**), providing the basis for the broad  
220 neutralization by WS6 and other antibodies targeting this site. Overall, these S2 stem-helix  
221 antibodies are likely to share a similar mechanism of neutralization. Before or even after spike

222 binds to ACE2, the stem helix appears to adopt a conformation or conformations that expose this  
223 supersite, allowing for the stem-helix antibodies to bind and prevent spike conformations needed  
224 for fusion, thereby stalling the entry process. Importantly, these S2-helix directed broad neutralizers  
225 have diverse origin genes, except for B6 and IgG22, which utilize the same VH gene and appears to  
226 be of the same antibody class (Figure S4B). In addition, the antibodies have only low-to-moderate  
227 somatic hypermutation, suggesting diverse ontogenies are possible with little barrier to their  
228 development (**Figure S4**).

229

## 230 **Discussion**

231 Zoonotic infections from beta-coronaviruses have caused multiple pandemics and endemics  
232 in recent years, including SARS (Drosten et al., 2003; Ksiazek et al., 2003), Middle East  
233 respiratory syndrome (MERS) (Zaki et al., 2012), and the ongoing COVID-19 (Zhou et al., 2020a;  
234 Zhu et al., 2020). It seems likely that additional beta-coronavirus zoonotic pandemics will occur in  
235 the future. Broadly neutralizing antibodies or broad vaccines against a wide spectrum of beta-  
236 coronaviruses may be effective at preventing or ameliorating such pandemics – and could even be  
237 of use against the current COVID-19, if variants do succeed in escape control by current vaccines.  
238 In this study, we isolated an S2-directed antibody, named WS6, from a mouse immunized with  
239 mRNA-encoded SARS-CoV-2 spike. WS6 could bind and neutralize all variants of SARS-CoV-2,  
240 including Delta and Omicron; it could also neutralize SARS-CoV, as well as bat, civet, and  
241 pangolin beta-coronaviruses related to SARS-CoV and SARS-CoV-2. Crystal structure of WS6 in  
242 complex with S2 stem-helix epitope peptide revealed the structural basis for broad recognition and,  
243 together with neutralization and binding analyses, suggest a potential mechanism by which WS6  
244 neutralize broadly beta-coronaviruses.

245           Several other groups have recently reported S2-directed antibodies including antibodies  
246 S2P6 (Pinto et al., 2021), CC40.8 (Zhou et al., 2021) and CV3-25 (Li et al., 2022) from SARS-  
247 CoV-2-infected convalescent donors and B6 (Sauer et al., 2021) and IgG22 (Hsieh et al., 2021)  
248 from vaccinated mice. We measured directly the neutralization of both WS6 and S2P6 to diverse  
249 SARS-CoV-2 variants and to diverse coronaviruses generally (**Figure S3**). In light of its high  
250 breadth, we were surprised to find S2P6 was unable to neutralize the Omicron variant of SARS-  
251 CoV-2, although WS6 did neutralize Omicron. WS6 did, however, neutralize all tested strains  
252 more potently than S2P6, except for MERS-CoV, against which WS6 was non-neutralizing. In  
253 terms of the murine antibodies, the recognition of antibodies B6 and IgG22 was very similar, both  
254 utilizing the same heavy chain origin gene (VH1-19) and both generated after immunization with  
255 spikes from SARS-CoV-2 and MERS-CoV (Hsieh et al., 2021; Pinto et al., 2021). By contrast,  
256 WS6 did not use the same V-gene and was generated only by immunization with the SARS-CoV-2  
257 spike – thereby revealing a new mode of murine S2-helix recognition and showing MERS-CoV  
258 spike immunization was no required to elicit these antibodies.

259           It will be interesting to determine whether S2-helix peptide-based immunizations can focus  
260 the immune response, enabling the elicitation of broadly neutralizing serological responses, as has  
261 been done with HIV-1 fusion peptide (Kong et al., 2019; Xu et al., 2018). Nanoparticles displaying  
262 the S2-helix may also be helpful in focusing the immune response, as has been done with the  
263 influenza stem cite of vulnerability (Boyoglu-Barnum et al., 2021; Kanekiyo et al., 2013; Yassine  
264 et al., 2015). Whether S2-helix focused immunization will enable sufficiently broad and potent  
265 responses to enable protection from future SARS-CoV-2 variants or to future beta-coronavirus  
266 zoonotic crossovers remains to be seen. It seems likely that such immune focusing can be carried

267 out in conjunction with spike-based immunizations, perhaps using currently licensed vaccines  
268 from Moderna, Pfizer and Johnson and Johnson, all of which incorporate the S2-helical region.

269

## 270 **Acknowledgements**

271 We thank R. Andrabi for providing CC40.8 coordinates, B. Graham for suggesting use of flpin-

272 TMPRSS2-ACE2 cells, T. Stephens for assistance with negative-stain EM, J. Stuckey for

273 assistance with figures, and members of the Virology Laboratory, Vaccine Research Center, for

274 discussions and comments on the manuscript. Support for this work was provided by the

275 Intramural Research Program of the Vaccine Research Center, National Institute of Allergy and

276 Infectious Diseases, National Institutes of Health and by federal funds from the Frederick National

277 Laboratory for Cancer Research under Contract HHSN261200800001E. Use of sector 22

278 (Southeast Region Collaborative Access team) at the Advanced Photon Source was supported by

279 the US Department of Energy, Basic Energy Sciences, Office of Science, under contract number

280 W-31-109-Eng-38.

281

## 282 **Author Contributions**

283 W.S. isolated antibodies WS1-WS11 and performed ELISA binding assays; L.W. headed

284 neutralization studies, prepared spike plasmids and performed cell surface binding assays; T.Z.

285 determined and analyzed the crystal structure of WS6-peptide complex, and wrote manuscript;

286 M.S. performed Octet binding assays, provided spike proteins for ELISA, and assisted with

287 obtaining peptide for crystallization; E.S.Y., Y.Z., and M.Chen performed WS6 neutralization of

288 SARS related viruses; X.C. provided mouse NGS sequence data; M.Choe provided S2P6 antibody;

289 A.C. provided 293 flpin-TMPRSS2-ACE2 cells; K.L. assisted with preparation of pseudoviruses;

290 A.S.O provided SARS-CoV-2 S2P-His for Octet measurements; A.P. and C.A.T performed cell  
291 surface staining; R.R. assisted with obtaining Peptide for crystallization; C.-H.S. prepared  
292 phylogenetic tree; E.-S.S. crystallized the protein complex; I.-T.T. performed transfection for Beta-  
293 CoV and S2 antibody productions; S.W. wrote manuscript and performed PISA analysis of  
294 antibody-peptide interface; K.S.C carried out mouse immunization experiment; Y.T. performed  
295 negative-stain EM analysis; J.R.M. supervised antibody isolation, neutralization assessments, and  
296 cell surface binding assays; P.D.K. oversaw the project and - with S.W and T.Z - wrote the  
297 manuscript, with all authors providing comments or revisions.

298

#### 299 **Competing interest declaration**

300 The authors declare no competing interest.

301

302

303 **METHODS**

304 **RESOURCE AVAILABILITY**

305 **Materials Availability**

306 Plasmids generated in this study are available upon request.

307

308 **Data and Code Availability**

309 Crystal diffraction data and structure coordinates of WS6 in complex have been deposited with the

310 Protein Data Bank, PDB: 7TCQ, DOI: 10.2210/pdb7tcq/pdb.

311

312 **EXPERIMENTAL MODEL AND SUBJECT DETAILS**

313 **Mouse Studies**

314 Animal experiments were carried out in compliance with all pertinent US National  
315 Institutes of Health regulations and approval from the Animal Care and Use Committee (ACUC)  
316 of the Vaccine Research Center. BALB/cJ mice (Jackson Laboratory), 6- to 8-week-old female,  
317 were used.

318

319 **Cell Lines**

320 FreeStyle 293-F (cat# R79007) and Expi293F cells (cat# A14528; RRID: CVCL\_D615)  
321 were purchased from ThermoFisher Scientific Inc. FreeStyle 293-F cells were maintained in  
322 FreeStyle 293 Expression Medium, while Expi293F cells were maintained in Expi Expression  
323 Medium. The above cell lines were used directly from the commercial sources and cultured  
324 according to manufacturer suggestions.

325

## 326 **METHOD DETAILS**

### 327 **Mouse immunization, hybridoma generation and mAb isolation**

328 Mice were immunized with mRNA coding for SARS-CoV-2 spike of the wildtype WA-1 strain at  
329 weeks 0 and 3 intramuscularly, utilizing methods described previously (Corbett et al., 2020). One  
330 mouse with the best neutralizing antibody titer against SARS-CoV-2 spike was boosted  
331 intravenously with 20  $\mu$ g of SARS-CoV-2 S-dTM at week 12. Three days later, splenocytes were  
332 harvested and fused with Sp2/0 myeloma cells (ATCC) using polyethylene glycol (PEG) 1450  
333 (50% (w/v), Sigma-Aldrich) according to the standard methods. Cells were cultured and screened  
334 in RPMI complete medium that contained 20% FCS and  $1 \times 100 \mu$ M hypoxanthine,  $0.4 \mu$ M  
335 aminopterin and  $16 \mu$ M thymidine (Sigma-Aldrich). Supernatants from resulting hybridomas  
336 were screened for binding, using ELISA, to SARS-CoV-2- S1, NTD, RBD or S-dTM as well as  
337 for neutralizing activity. Subclones were generated by limiting dilution. After three rounds of  
338 screening and subcloning, stable antibody-producing clones were isolated and adapted to  
339 hybridoma-serum-free medium (Life Technologies Corp., Grand Island, NY, USA). Supernatants  
340 were collected from selected hybridoma clones and purified through a protein G-sepharose column  
341 (GE Healthcare). mAbs were isotyped with Pierce rapid isotyping kit (Cat#26178). mAb Fabs  
342 were generated using Pierce Fab kit (Cat#44985) following manufacturer's instructions. mAb and  
343 Fab purity was confirmed by SDS-PAGE. Selected hybridoma were sent to GenScript  
344 (Piscataway, NJ 08854, USA) for hybridoma heavy and light chain variable sequences and IMGT  
345 analysis.

346

### 347 **ELISA and dot-blot**



348 ELISA plates were coated with the SARS-CoV-2 proteins, S-dTM, S1-short (residues 1-670), S1R  
349 (residues 1-537), RBD, and NTD, at 1  $\mu$ g/ml in PBS at 4  $^{\circ}$ C overnight. After standard washes  
350 and blocks, plates were incubated with 50ul/each well, serial dilutions of mAbs for one hour at  
351 room temperature. Anti-mouse whole IgG horseradish peroxidase conjugates (Jackson Laboratory)  
352 were used as secondary antibodies, and 3,5,3'5'-tetramethylbenzidine (TMB) (KPL, Gaithersburg,  
353 MD) was used as the substrate.

354 To identify WS6 epitope, a dot-blot was performed. SARS-CoV spike peptide array (NR-  
355 52418), was purchased from BEI resource. Seventy-eight peptides (#91-169) from the peptide  
356 array which covers SARS-CoV spike S2 region, were dotted on a nitrocellulose membrane  
357 respectively, 20ng/2ul/each dot. SARS-CoV-2 RBD, S2, S-dTM and S2P proteins were also dotted  
358 on the membrane as controls. Block non-specific sites by soaking in 5% dry milk in PBS-Tween  
359 20. The membrane was washed three times with PBS-T buffer, then incubated with 2ug/ml of  
360 mAb, WS6 in blocking buffer for one hour at room temperature. After wash three times with PBS-  
361 T buffer, the membrane was incubated half hour with anti-mouse IgG horseradish peroxidase  
362 conjugates (Jackson Laboratory) as secondary antibody. Then membrane was developed with ECL  
363 medium.

364

### 365 **Expression and purification of beta-coronavirus spike trimer proteins**

366 Diverse beta-coronavirus spike soluble proteins were stabilized in prefusion conformation by  
367 double-proline mutations corresponding to K986P and V987P in SARS CoV-2 spike protein, along  
368 with a T4-phage fibrin trimerization domain (foldon) at the C terminus (Wrapp et al., 2020)  
369 followed by an HRV3C cleavage site, His8 and Twin-Streptactin purification tags. Additionally,  
370 the furin cleavage sites between S1 and S2 were mutated; for HKU1 and OC43, RRKRR was

371 replaced by GGSGG; for MERS-CoV, RSVR was replaced with ASVG; for SARS-CoV, SHC014,  
372 WIV1, and RaTG13, SLLRST was replaced with SLLAST. DNA sequences encoding diverse  
373 beta-coronavirus S2P proteins were cloned into mammalian expression vector pVRC8400 and the  
374 proteins expressed by transient transfection of FreeStyle 293-F cells as previously described (Zhou  
375 et al., 2020b). Specifically, 1 mg of transfection grade plasmid DNA and 3 ml of Turbo293  
376 transfection reagent (Speed BioSystems) each in 20ml Opti-MEM (Thermo Fisher Scientific),  
377 were pre-mixed and transfected into FreeStyle 293-F cells. Transfected cells were grown for 6  
378 days at 37 °C, and the supernatant was harvested by centrifugation to remove cell debris.  
379 Supernatants were sterile-filtered, and the spike trimers were purified by nickel affinity  
380 chromatography using cComplete His-Tag purification resin. The resin was washed with 50 mM  
381 Tris, 400 mM NaCl, 10 mM and 25 mM Imidazole pH 8.0 buffer. The proteins were eluted in 50  
382 mM Tris pH 8.0, 400 mM NaCl, 300 mM Imidazole. Protein fractions were pooled and further  
383 purified by size-exclusion chromatography (SEC) using a Superdex 200 16/600 column (Cytiva) in  
384 PBS. Fractions corresponding to trimeric spike proteins were pooled, concentrated to 1 mg/ml.

385

### 386 **Production of antibodies**

387 Antibody heavy and light variable region gene sequences were synthesized (Gene Universal Inc,  
388 Newark DE) and subcloned into corresponding pVRC8400 vectors (<https://www.addgene.org>).  
389 The resulting plasmids of heavy and light chain pairs were co-transfected in Expi293F cells  
390 (Thermo Fisher) using Turbo293 transfection reagent (Speed BioSystems) as described previously  
391 (Wu et al., 2011). On day 6 post transfection, the culture supernatants were harvested, sterile  
392 filtered and loaded onto a protein A column. The columns were washed with PBS, and IgG  
393 proteins were eluted with a low pH IgG elution buffer (Pierce) and immediately neutralized with

394 1M Tris-HCl pH 8.0. Purified IgGs were subsequently dialyzed twice against PBS pH 7.4 using 10  
395 kD dialysis cartridges (Pierce) and used for measurements.

396

### 397 **Full-length spike constructs**

398 Codon optimized cDNAs encoding full-length spike from SARS-CoV-2 (GenBank ID:  
399 QHD43416.1) were synthesized, cloned into the mammalian expression vector VRC8400  
400 (Barouch et al., 2005) and confirmed by sequencing. Spike containing D614G amino acid change  
401 was generated using the wildtype spike sequence. Other variants containing single or multiple  
402 amino-acid changes in the spike gene from wildtype or D614G were made by mutagenesis using  
403 QuickChange lightning Multi Site-Directed Mutagenesis Kit (cat # 210515, Agilent) or via  
404 synthesis and cloning (Genscript). The spike variants tested are B.1.1.7 ( H69del-V70del-Y144del-  
405 N501Y-A570D-D614G-P681H-T716I-S982A-D1118H), B.1.351 (L18F-D80A-D215G-(L242-  
406 244)del-R246I-K417N-E484K-N501Y-A701V), P.1 (L18F-T20N-P26S-D138Y-R190S-K417T-  
407 E484K-N501Y-D614G-H655Y-T1027I-V1176F), B.1.617.2 ( T19R, G142D, del156-157, R158G,  
408 L452R, T478K, D614G, P681R, D950N), AY.1 (T19R, T95I, G142D, E156del, F157del, R158G,  
409 W258L, K417N, L452R, T478K, D614G, P681R, D950N), B.1.621 (T95I, insert144T, Y144S,  
410 Y145N, R346K, E484K, N501Y, D614G, P681H, D950N) and B.1.1.529 ( A67V, H69del,  
411 V70del, T95I, G142D, V143del, Y144del, Y145del, N211del,L212I, ins214EPE, G339D, S371L,  
412 S373P, S375F, K417N, N440K, G446S, S477N, T478K, E484A, Q493R, G496S, Q498R, N501Y,  
413 Y505H, T547K, D614G, H655Y, N679K, P681H, N764K, D796Y, N856K, Q954H, N969K,  
414 L981F). The spike genes from SARS-CoV-2 related CoVs (RaTG13\_GenBank: QHR63300.2;  
415 Pangolin GD\_GenBank: QIA48632.1; Pangolin\_GX-P2V\_ QIQ54048.1), SARS-CoV and related  
416 CoVs (SARS-CoV Urbani\_ GenBank: AAP13441.1; Frankfurt1\_ GenBank: BAE93401.1; Civet

417 SARS CoV 007/2004 S\_ GenBank: AAU04646.1; WIV1\_GenBank: KF367457;  
418 SHC014\_GenBank: KC881005), MERS-CoV EMC\_ GenBank: AFS88936), hCoV-HKU1  
419 (GenBank: AAT98580.1), hCoV-OC43 (GenBank: AAT84354.1), hCoV-NL63 (GenBank:  
420 Q6Q1S2.1) and hCoV-229E (GenBank: AOG74783.1) were synthesized (Genscript). These full-  
421 length spike plasmids were used for pseudovirus production and for cell surface binding assays.

422

### 423 **Analysis of WS6 binding to cell surface expressed spike protein**

424 Expi-293 cells were transiently transfected with plasmids encoding full-length spike proteins of  
425 coronaviruses using Turbo293 transfection reagent (Speed BioSystems) following manufacturer's  
426 protocol. After 40 hours, cells were harvested and incubated with monoclonal antibodies (1 µg/ml)  
427 for 30 minutes. Cells were washed and incubated with an allophycocyanin conjugated anti-human  
428 IgG (709-136-149, Jackson Immunoresearch Laboratories) for another 30 minutes, then washed  
429 and fixed with 1% paraformaldehyde (15712-S, Electron Microscopy Sciences). Flow cytometry  
430 data were acquired in a BD LSRFortessa X-50 flow cytometer (BD biosciences) and analyzed  
431 using Flowjo (BD biosciences).

432

### 433 **Pseudovirus neutralization assay**

434 Spike-containing lentiviral pseudovirions were produced by co-transfection of packaging plasmid  
435 pCMVdR8.2, transducing plasmid pHR' CMV-Luc, a TMPRSS2 plasmid and S plasmids from  
436 human and animal coronaviruses (SARS-CoV-2 variants, SARS-CoV, MERS-CoV and SARS-  
437 CoV-2, SARS-CoV related coronaviruses) into 293T cells using Lipofectamine 3000 transfection  
438 reagent (L3000-001, ThermoFisher Scientific, Asheville, NC) (Naldini et al., 1996). 293T-ACE2  
439 cells (provided by Dr. Michael Farzan) or 293 flpin-TMPRSS2-ACE2 cells (made at the VRC)

440 were plated into 96-well white/black Isoplates (PerkinElmer, Waltham, MA) at 75,000 cells per  
441 well the day before infection of pseudovirus. Serial dilutions of mAbs were mixed with titrated  
442 pseudovirus, incubated for 45 minutes at 37°C and added to cells in triplicate. Following 2 h of  
443 incubation, wells were replenished with 150 µl of fresh media. Cells were lysed 72 h later, and  
444 luciferase activity was measured with Microbeta (Perkin Elmer). Percent neutralization and  
445 neutralization IC<sub>50</sub>s, IC<sub>80</sub>s were calculated using GraphPad Prism 8.0.2.

446

#### 447 **Neutralization by fusion inhibition (post attachment inhibition)**

448 BHK21-ACE2 or 293 flpin-TMPRSS2-ACE2 cells were placed on ice for one hour before  
449 incubating with SARS-CoV-2 spike pseudotyped lentivirus on ice for another hour to allow the virus  
450 to attach to ACE2. After 3 times of wash the cells were then incubated with mAbs on ice for  
451 additional one hour before returned to the incubator. Cells were lysed 72 h later, and luciferase  
452 activity was measured with Microbeta (Perkin Elmer). Percent neutralization and neutralization  
453 IC<sub>50</sub>s, IC<sub>80</sub>s were calculated using GraphPad Prism 8.0.2.

454

#### 455 **Biolayer interferometry analysis of antibody binding affinity**

456 Binding kinetics of WS6 IgG and related S2-stem helix antibodies to diverse CoV 2P-stabilized  
457 spike proteins (S2Ps) were measured by biolayer interferometry using an Octet HTX instrument  
458 (Sartorius). All assays were performed in tilted 384-well plates (Geiger Bio-one) in HBS-EP+  
459 buffer with agitation set to 1000 rpm at 30°C. The final volume for all solutions was 60-80 µl/well.  
460 Prior to running the assays, Anti Mouse Fc (AMC) biosensor tips were equilibrated in PBS for ~5  
461 minutes. WS6 antibody IgG at 10 µg/ml were loaded onto AMC biosensors for 60s. Biosensors  
462 were then equilibrated in HBS-EP+ buffer for 60s prior to measuring association with diverse beta-

463 CoV S2P trimers in solution (0.0019  $\mu$ M to 0.5 $\mu$ M) for 300s; trimer proteins were then allowed to  
464 dissociate for 600s. Parallel correction to subtract systematic baseline drift was carried out by  
465 subtracting the measurements recorded for a sensor loaded with antibody incubated in HBS-EP+  
466 buffer. Data analysis and curve fitting were carried out using Octet analysis software, version 12.0  
467 (Sartorius). Experimental data were fitted using a 1:1 interaction to determine apparent  
468 dissociation constants and  $k_{on}$  values.

469

#### 470 **Crystallization and structure determination**

471 The N-terminal acetylated, C-terminal biotin-pegylated, 10-residue SARS-CoV-2 S2 peptide  
472 FKEELDKYFK (GenScript) was dissolved in 100% DMSO at 10 mg/mL and then diluted with  
473 PBS to 1 mg/mL. Fab WS6 was incubated with the peptide in a 1:2 molar ratio for 5 minutes to  
474 form complex. The Fab-peptide complex was concentrated to 10-15 mg/mL and screened for  
475 crystallization using 576 conditions from Hampton screen, Precipitant Synergy screen, and  
476 QIAGEN Wizard screen with a Mosquito robot mixing 100 nL reservoir solution and 100 nL  
477 protein solution per drop. Crystals were obtained from the solution containing 2% v/v PEG 400, 2  
478 M (NH<sub>4</sub>)<sub>2</sub>SO<sub>4</sub>, 100 mM sodium acetate pH 5.5. Crystal drops were set up in 15-well plates using  
479 0.5  $\mu$ L WS6-peptide complex and 0.5  $\mu$ L of 80-100% concentration of the aforementioned  
480 crystallization solution. Crystals were cryoprotected in the aforementioned solution supplemented  
481 with 50% additional precipitant and 15% v/v (2R,3R)-2,3-Butanediol and flash frozen in liquid  
482 nitrogen.

483 X-ray diffraction data were collected at the Advanced Photon Source (beamline SER-CAT  
484 ID22 and BM22). The diffraction data were indexed, integrated, and scaled with the HKL2000  
485 package (Otwinowski and Minor, 1997). The structures were determined by molecular

486 replacement with Phaser (McCoy et al., 2007) in the CCP4 Program Suite (Collaborative  
487 Computational Project, 1994). Further refinement was carried out with PHENIX (Adams et al.,  
488 2010), starting with torsion-angle simulated annealing with slow cooling. Iterative manual model  
489 building was carried out with COOT (Emsley and Cowtan, 2004) with maps generated from  
490 combinations of standard positional, individual B-factor and TLS refinement algorithms. X-ray  
491 data and refinement statistics are summarized in Table S2.

492

### 493 **Antibody germline assignment**

494 Germline gene of heavy and light chain were assigned by querying nucleotide sequences on  
495 IGBLAST server. B6 heavy and light chain germline gene were assigned by submitting protein  
496 sequence. The V gene identity was reported as the identity to the germline nucleotide sequences.

497

### 498 **Antibody frequency calculation**

499 The mouse Ig deep sequencing samples were prepared and used to predict probability of  
500 generation of specific protein sequences on CDR3. Human Ig deep sequencing samples were  
501 downloaded from Bioproject PRJNA511481. The Ig sequences were sieved for IGOR to inference  
502 the model (Marcou et al., 2018). The inferred models were used by OLGA to predict probability  
503 of having specific CDR3 sequences (Sethna et al., 2019). Signature of CV3-25 class antibody was  
504 defined as heavy chain IGHV5-51 and light chain IGKV1-12 germline gene, the R94, 96PQYC,  
505 G100b, C100d, and W100g on 18 amino acids CDR H3. The frequency of S2P6 class antibody  
506 was calculated by defining signature as IGHV1-46 germline gene with 97PKG in 11 amino acids  
507 CDR H3, and IGKV3-20 with Y91, 93SSPP and 96F on 11 amino acids CDR L3. The frequency  
508 of cc40.8 class antibody was calculated by masking IGHV3-23 with 94ITMA, 101V and 102V on

509 8 amino acids CDR H3 and IGLV3-10 with T91, 94SGN, and A96 on 11 amino acids CDR L3.  
510 The frequency of WS6 class antibody calculated by using mouse IGHV1-5 gene with 95TGS on 7  
511 amino acids CDR H3, and IGKV4-61 gene with 91Y, 94Y and 96P on 9 amino acids CDR L3. B6  
512 and IgG22 used identical heavy chain germline gene, although the light chain used different  
513 germline genes, it shared similar contact residues. B6/IgG22 class frequency was calculated by  
514 IGHV1-19 germline gene with CX{5,10}RX{4,6}W signature on CDR H3 amino acids, and  
515 IGKV8-27 /IGKV1-99 germline genes with 92[LN] and 95[FY] on 8 amino acids length CDR L3.

516

### 517 **Phylogenetic tree**

518 Alpha-coronavirus spike sequences were downloaded using accession codes (NL63:Q6Q1S2.1,  
519 229E:AOG74783.1, Feline:AAY32596.1, Mink:ADI80513.1). Beta-coronavirus spike sequences  
520 were downloaded from NCBI server using accession codes listed in Full-length spike constructs.  
521 ClustalW was used to calculate neighbor joining (NJ) tree (Larkin et al., 2007), and Dendroscope  
522 was used to plot the Neighbor Joining tree (Albrecht et al., 2012).

523

### 524 **QUANTIFICATION AND STATISTICAL ANALYSIS**

525 The BLI data were analyzed and plotted using GraphPad Prism. Crystal diffraction data  
526 and structural refinement statistics were analyzed with HKL2000, Phenix, and Molprobitry.  
527 Statistical details of experiments are described in Method Details or figure legends.

528

529



## 530 **References**

- 531 Adams, P.D., Afonine, P.V., Bunkoczi, G., Chen, V.B., Davis, I.W., Echols, N., Headd, J.J., Hung,  
532 L.W., Kapral, G.J., Grosse-Kunstleve, R.W., *et al.* (2010). PHENIX: a comprehensive Python-  
533 based system for macromolecular structure solution. *Acta Crystallogr D Biol Crystallogr* 66, 213-  
534 21.
- 535 Albrecht, B., Scornavacca, C., Cenci, A., and Huson, D.H. (2012). Fast computation of minimum  
536 hybridization networks. *Bioinformatics* 28, 191-7.
- 537 Araf, Y., Akter, F., Tang, Y.D., Fatemi, R., Parvez, S.A., Zheng, C., and Hossain, G. (2022).  
538 Omicron variant of SARS-CoV-2: Genomics, transmissibility, and responses to current COVID-19  
539 vaccines. *J Med Virol*, 10.1002/jmv.27588.
- 540 Barnes, C.O., West, A.P., Jr., Huey-Tubman, K.E., Hoffmann, M.A.G., Sharaf, N.G., Hoffman,  
541 P.R., Koranda, N., Gristick, H.B., Gaebler, C., Muecksch, F., *et al.* (2020). Structures of Human  
542 Antibodies Bound to SARS-CoV-2 Spike Reveal Common Epitopes and Recurrent Features of  
543 Antibodies. *Cell* 182, 828-842 e16.
- 544 Barouch, D.H., Yang, Z.Y., Kong, W.P., Koriath-Schmitz, B., Sumida, S.M., Truitt, D.M., Kishko,  
545 M.G., Arthur, J.C., Miura, A., Mascola, J.R., *et al.* (2005). A human T-cell leukemia virus type 1  
546 regulatory element enhances the immunogenicity of human immunodeficiency virus type 1 DNA  
547 vaccines in mice and nonhuman primates. *J Virol* 79, 8828-34.
- 548 Boyoglu-Barnum, S., Ellis, D., Gillespie, R.A., Hutchinson, G.B., Park, Y.J., Moin, S.M., Acton,  
549 O.J., Ravichandran, R., Murphy, M., Pettie, D., *et al.* (2021). Quadrivalent influenza nanoparticle  
550 vaccines induce broad protection. *Nature* 592, 623-628.
- 551 Brouwer, P.J.M., Caniels, T.G., van der Straten, K., Snitselaar, J.L., Aldon, Y., Bangaru, S.,  
552 Torres, J.L., Okba, N.M.A., Claireaux, M., Kerster, G., *et al.* (2020). Potent neutralizing antibodies  
553 from COVID-19 patients define multiple targets of vulnerability. *Science* 369, 643-650.
- 554 Cai, Y., Zhang, J., Xiao, T., Peng, H., Sterling, S.M., Walsh, R.M., Rawson, S., Rits-Volloch, S.,  
555 and Chen, B. (2020). Distinct conformational states of SARS-CoV-2 spike protein. *Science*,  
556 eabd4251.
- 557 Cao, Y., Su, B., Guo, X., Sun, W., Deng, Y., Bao, L., Zhu, Q., Zhang, X., Zheng, Y., Geng, C., *et*  
558 *al.* (2020). Potent neutralizing antibodies against SARS-CoV-2 identified by high-throughput  
559 single-cell sequencing of convalescent patients' B cells. *Cell*, 10.1016/j.cell.2020.05.025.
- 560 Cerutti, G., Guo, Y., Zhou, T., Gorman, J., Lee, M., Rapp, M., Reddem, E.R., Yu, J., Bahna, F.,  
561 Bimela, J., *et al.* (2021). Potent SARS-CoV-2 neutralizing antibodies directed against spike N-  
562 terminal domain target a single supersite. *Cell Host Microbe* 29, 819-833 e7.
- 563 Collaborative Computational Project, N. (1994). The CCP4 suite: programs for protein  
564 crystallography. *Acta Crystallogr D Biol Crystallogr* 50, 760-3.

- 565 Corbett, K.S., Edwards, D.K., Leist, S.R., Abiona, O.M., Boyoglu-Barnum, S., Gillespie, R.A.,  
566 Himansu, S., Schafer, A., Ziwawo, C.T., DiPiazza, A.T., *et al.* (2020). SARS-CoV-2 mRNA  
567 vaccine design enabled by prototype pathogen preparedness. *Nature* 586, 567-571.
- 568 Doria-Rose, N.A., Shen, X., Schmidt, S.D., O'Dell, S., McDanal, C., Feng, W., Tong, J., Eaton, A.,  
569 Maglinao, M., Tang, H., *et al.* (2021). Booster of mRNA-1273 Strengthens SARS-CoV-2 Omicron  
570 Neutralization. medRxiv, 10.1101/2021.12.15.21267805.
- 571 Drosten, C., Gunther, S., Preiser, W., van der Werf, S., Brodt, H.R., Becker, S., Rabenau, H.,  
572 Panning, M., Kolesnikova, L., Fouchier, R.A., *et al.* (2003). Identification of a novel coronavirus  
573 in patients with severe acute respiratory syndrome. *N Engl J Med* 348, 1967-76.
- 574 Edara, V.V., Manning, K.E., Ellis, M., Lai, L., Moore, K.M., Foster, S.L., Floyd, K., Davis-  
575 Gardner, M.E., Mantus, G., Nyhoff, L.E., *et al.* (2021). mRNA-1273 and BNT162b2 mRNA  
576 vaccines have reduced neutralizing activity against the SARS-CoV-2 Omicron variant. bioRxiv,  
577 10.1101/2021.12.20.473557.
- 578 Emsley, P., and Cowtan, K. (2004). Coot: model-building tools for molecular graphics. *Acta*  
579 *Crystallogr D Biol Crystallogr* 60, 2126-32.
- 580 Garcia-Beltran, W.F., St Denis, K.J., Hoelzemer, A., Lam, E.C., Nitido, A.D., Sheehan, M.L.,  
581 Berrios, C., Ofoman, O., Chang, C.C., Hauser, B.M., *et al.* (2022). mRNA-based COVID-19  
582 vaccine boosters induce neutralizing immunity against SARS-CoV-2 Omicron variant. *Cell*,  
583 10.1016/j.cell.2021.12.033.
- 584 Hsieh, C.L., Werner, A.P., Leist, S.R., Stevens, L.J., Falconer, E., Goldsmith, J.A., Chou, C.W.,  
585 Abiona, O.M., West, A., Westendorf, K., *et al.* (2021). Stabilized coronavirus spike stem elicits a  
586 broadly protective antibody. *Cell Rep* 37, 109929.
- 587 Ju, B., Zhang, Q., Ge, J., Wang, R., Sun, J., Ge, X., Yu, J., Shan, S., Zhou, B., Song, S., *et al.*  
588 (2020). Human neutralizing antibodies elicited by SARS-CoV-2 infection. *Nature* 584, 115-119.
- 589 Kanekiyo, M., Wei, C.J., Yassine, H.M., McTamney, P.M., Boyington, J.C., Whittle, J.R., Rao,  
590 S.S., Kong, W.P., Wang, L., and Nabel, G.J. (2013). Self-assembling influenza nanoparticle  
591 vaccines elicit broadly neutralizing H1N1 antibodies. *Nature* 499, 102-6.
- 592 Ke, Z., Oton, J., Qu, K., Cortese, M., Zila, V., McKeane, L., Nakane, T., Zivanov, J., Neufeldt,  
593 C.J., Cerikan, B., *et al.* (2020). Structures and distributions of SARS-CoV-2 spike proteins on  
594 intact virions. *Nature* 588, 498-502.
- 595 Kong, R., Duan, H., Sheng, Z., Xu, K., Acharya, P., Chen, X., Cheng, C., Dingens, A.S., Gorman,  
596 J., Sastry, M., *et al.* (2019). Antibody Lineages with Vaccine-Induced Antigen-Binding Hotspots  
597 Develop Broad HIV Neutralization. *Cell* 178, 567-584 e19.
- 598 Kong, R., Xu, K., Zhou, T., Acharya, P., Lemmin, T., Liu, K., Ozorowski, G., Soto, C., Taft, J.D.,  
599 Bailer, R.T., *et al.* (2016). Fusion peptide of HIV-1 as a site of vulnerability to neutralizing  
600 antibody. *Science* 352, 828-33.

- 601 Ksiazek, T.G., Erdman, D., Goldsmith, C.S., Zaki, S.R., Peret, T., Emery, S., Tong, S., Urbani, C.,  
602 Comer, J.A., Lim, W., *et al.* (2003). A novel coronavirus associated with severe acute respiratory  
603 syndrome. *N Engl J Med* 348, 1953-66.
- 604 Larkin, M.A., Blackshields, G., Brown, N.P., Chenna, R., McGettigan, P.A., McWilliam, H.,  
605 Valentin, F., Wallace, I.M., Wilm, A., Lopez, R., *et al.* (2007). Clustal W and Clustal X version  
606 2.0. *Bioinformatics* 23, 2947-8.
- 607 Li, W., Chen, Y., Prevost, J., Ullah, I., Lu, M., Gong, S.Y., Tauzin, A., Gasser, R., Vezina, D.,  
608 Anand, S.P., *et al.* (2022). Structural basis and mode of action for two broadly neutralizing  
609 antibodies against SARS-CoV-2 emerging variants of concern. *Cell Rep* 38, 110210.
- 610 Liu, L., Iketani, S., Guo, Y., Chan, J.F., Wang, M., Liu, L., Luo, Y., Chu, H., Huang, Y., Nair,  
611 M.S., *et al.* (2021). Striking Antibody Evasion Manifested by the Omicron Variant of SARS-CoV-  
612 2. *Nature*, 2021.12.14.472719.
- 613 Liu, L., Wang, P., Nair, M.S., Yu, J., Rapp, M., Wang, Q., Luo, Y., Chan, J.F., Sahi, V., Figueroa,  
614 A., *et al.* (2020). Potent neutralizing antibodies against multiple epitopes on SARS-CoV-2 spike.  
615 *Nature* 584, 450-456.
- 616 Marcou, Q., Mora, T., and Walczak, A.M. (2018). High-throughput immune repertoire analysis  
617 with IGoR. *Nat Commun* 9, 561.
- 618 McCallum, M., De Marco, A., Lempp, F.A., Tortorici, M.A., Pinto, D., Walls, A.C., Beltramello,  
619 M., Chen, A., Liu, Z., Zatta, F., *et al.* (2021). N-terminal domain antigenic mapping reveals a site  
620 of vulnerability for SARS-CoV-2. *Cell* 184, 2332-2347 e16.
- 621 McCoy, A.J., Grosse-Kunstleve, R.W., Adams, P.D., Winn, M.D., Storoni, L.C., and Read, R.J.  
622 (2007). Phaser crystallographic software. *J Appl Crystallogr* 40, 658-674.
- 623 Naldini, L., Blomer, U., Gage, F.H., Trono, D., and Verma, I.M. (1996). Efficient transfer,  
624 integration, and sustained long-term expression of the transgene in adult rat brains injected with a  
625 lentiviral vector. *Proc Natl Acad Sci U S A* 93, 11382-8.
- 626 Otwinowski, Z., and Minor, W. (1997). Processing of X-ray diffraction data collected in oscillation  
627 mode. *Methods Enzymol* 276, 307-26.
- 628 Pinto, D., Sauer, M.M., Czudnochowski, N., Low, J.S., Tortorici, M.A., Housley, M.P., Noack, J.,  
629 Walls, A.C., Bowen, J.E., Guarino, B., *et al.* (2021). Broad betacoronavirus neutralization by a  
630 stem helix-specific human antibody. *Science* 373, 1109-1116.
- 631 Robbiani, D.F., Gaebler, C., Muecksch, F., Lorenzi, J.C.C., Wang, Z., Cho, A., Agudelo, M.,  
632 Barnes, C.O., Gazumyan, A., Finkin, S., *et al.* (2020). Convergent antibody responses to SARS-  
633 CoV-2 in convalescent individuals. *Nature* 584, 437-442.
- 634 Rogers, T.F., Zhao, F., Huang, D., Beutler, N., Burns, A., He, W.T., Limbo, O., Smith, C., Song,  
635 G., Woehl, J., *et al.* (2020). Isolation of potent SARS-CoV-2 neutralizing antibodies and protection  
636 from disease in a small animal model. *Science* 369, 956-963.

- 637 Sauer, M.M., Tortorici, M.A., Park, Y.J., Walls, A.C., Homad, L., Acton, O.J., Bowen, J.E., Wang,  
638 C., Xiong, X., de van der Schueren, W., *et al.* (2021). Structural basis for broad coronavirus  
639 neutralization. *Nat Struct Mol Biol* 28, 478-486.
- 640 Sethna, Z., Elhanati, Y., Callan, C.G., Walczak, A.M., and Mora, T. (2019). OLGA: fast  
641 computation of generation probabilities of B- and T-cell receptor amino acid sequences and motifs.  
642 *Bioinformatics* 35, 2974-2981.
- 643 Seydoux, E., Homad, L.J., MacCamy, A.J., Parks, K.R., Hurlburt, N.K., Jennewein, M.F., Akins,  
644 N.R., Stuart, A.B., Wan, Y.H., Feng, J., *et al.* (2020). Analysis of a SARS-CoV-2-Infected  
645 Individual Reveals Development of Potent Neutralizing Antibodies with Limited Somatic  
646 Mutation. *Immunity* 53, 98-105 e5.
- 647 Sievers, B.L., Chakraborty, S., Xue, Y., Gelbart, T., Gonzalez, J.C., Cassidy, A.G., Golan, Y.,  
648 Prah, M., Gaw, S.L., Arunachalam, P.S., *et al.* (2022). Antibodies elicited by SARS-CoV-2  
649 infection or mRNA vaccines have reduced neutralizing activity against Beta and Omicron  
650 pseudoviruses. *Sci Transl Med*, eabn7842.
- 651 Suryadevara, N., Shrihari, S., Gilchuk, P., VanBlargan, L.A., Binshtein, E., Zost, S.J., Nargi, R.S.,  
652 Sutton, R.E., Winkler, E.S., Chen, E.C., *et al.* (2021). Neutralizing and protective human  
653 monoclonal antibodies recognizing the N-terminal domain of the SARS-CoV-2 spike protein. *Cell*  
654 184, 2316-2331 e15.
- 655 Syed, A.M., Ciling, A., Khalid, M.M., Sreekumar, B., Chen, P.Y., Kumar, G.R., Silva, I., Milbes,  
656 B., Kojima, N., Hess, V., *et al.* (2022). Omicron mutations enhance infectivity and reduce antibody  
657 neutralization of SARS-CoV-2 virus-like particles. *medRxiv*, 10.1101/2021.12.20.21268048.
- 658 Wang, L., Zhou, T., Zhang, Y., Yang, E.S., Schramm, C.A., Shi, W., Pegu, A., Oloniniyi, O.K.,  
659 Henry, A.R., Darko, S., *et al.* (2021). Ultrapotent antibodies against diverse and highly  
660 transmissible SARS-CoV-2 variants. *Science* 373, eabh1766.
- 661 Wrapp, D., Wang, N., Corbett, K.S., Goldsmith, J.A., Hsieh, C.L., Abiona, O., Graham, B.S., and  
662 McLellan, J.S. (2020). Cryo-EM structure of the 2019-nCoV spike in the prefusion conformation.  
663 *Science* 367, 1260-1263.
- 664 Wu, X., Zhou, T., Zhu, J., Zhang, B., Georgiev, I., Wang, C., Chen, X., Longo, N.S., Louder, M.,  
665 McKee, K., *et al.* (2011). Focused evolution of HIV-1 neutralizing antibodies revealed by  
666 structures and deep sequencing. *Science* 333, 1593-602.
- 667 Xu, K., Acharya, P., Kong, R., Cheng, C., Chuang, G.Y., Liu, K., Louder, M.K., O'Dell, S., Rawi,  
668 R., Sastry, M., *et al.* (2018). Epitope-based vaccine design yields fusion peptide-directed  
669 antibodies that neutralize diverse strains of HIV-1. *Nat Med* 24, 857-867.
- 670 Yassine, H.M., Boyington, J.C., McTamney, P.M., Wei, C.J., Kanekiyo, M., Kong, W.P.,  
671 Gallagher, J.R., Wang, L., Zhang, Y., Joyce, M.G., *et al.* (2015). Hemagglutinin-stem  
672 nanoparticles generate heterosubtypic influenza protection. *Nat Med* 21, 1065-70.

- 673 Zaki, A.M., van Boheemen, S., Bestebroer, T.M., Osterhaus, A.D., and Fouchier, R.A. (2012).  
674 Isolation of a novel coronavirus from a man with pneumonia in Saudi Arabia. *N Engl J Med* 367,  
675 1814-20.
- 676 Zhou, P., Yang, X.L., Wang, X.G., Hu, B., Zhang, L., Zhang, W., Si, H.R., Zhu, Y., Li, B., Huang,  
677 C.L., *et al.* (2020a). A pneumonia outbreak associated with a new coronavirus of probable bat  
678 origin. *Nature* 579, 270-273.
- 679 Zhou, P., Yuan, M., Song, G., Beutler, N., Shaabani, N., Huang, D., He, W.T., Zhu, X., Callaghan,  
680 S., Yong, P., *et al.* (2021). A protective broadly cross-reactive human antibody defines a conserved  
681 site of vulnerability on beta-coronavirus spikes. *bioRxiv*, 10.1101/2021.03.30.437769.
- 682 Zhou, T., Teng, I.T., Olia, A.S., Cerutti, G., Gorman, J., Nazzari, A., Shi, W., Tsybovsky, Y.,  
683 Wang, L., Wang, S., *et al.* (2020b). Structure-Based Design with Tag-Based Purification and In-  
684 Process Biotinylation Enable Streamlined Development of SARS-CoV-2 Spike Molecular Probes.  
685 *Cell Rep* 33, 108322.
- 686 Zhu, N., Zhang, D., Wang, W., Li, X., Yang, B., Song, J., Zhao, X., Huang, B., Shi, W., Lu, R., *et*  
687 *al.* (2020). A Novel Coronavirus from Patients with Pneumonia in China, 2019. *N Engl J Med* 382,  
688 727-733.
- 689 Zost, S.J., Gilchuk, P., Chen, R.E., Case, J.B., Reidy, J.X., Trivette, A., Nargi, R.S., Sutton, R.E.,  
690 Suryadevara, N., Chen, E.C., *et al.* (2020). Rapid isolation and profiling of a diverse panel of  
691 human monoclonal antibodies targeting the SARS-CoV-2 spike protein. *Nat Med* 26, 1422-1427.
- 692

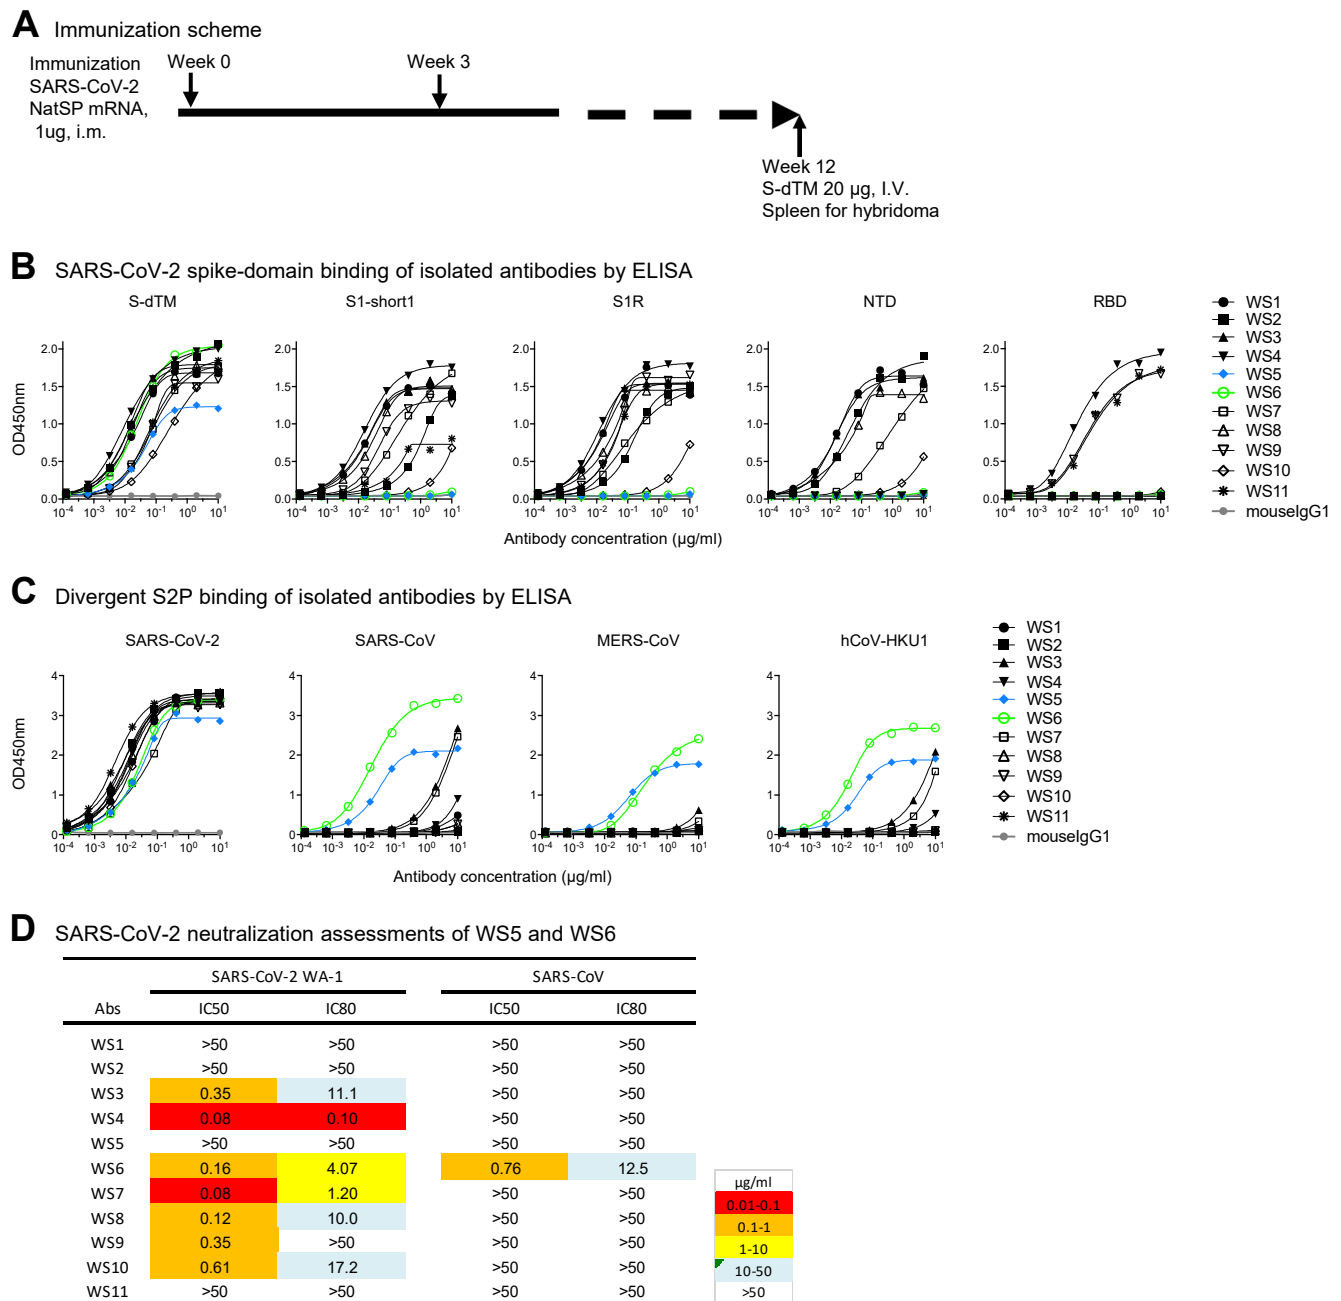

**Figure 1. Spike mRNA immunized mice elicit antibodies against diverse regions of spike, several of which bound diverse beta-coronavirus spikes and one of which, WS6, neutralized.**

(A) Immunization scheme. NatSP is the full transmembrane-containing native sequence of spike WA-1 strain; S-dTM is the soluble spike protein residues 1-1206 of wildtype WA-1 strain. (B) Binding of isolated antibodies by ELISA to prefusion-stabilized spike (S2P) and its subdomains. Purified monoclonal antibodies from hybridoma supernatants were analyzed for binding to SARS-CoV-2 S-dTM, S1 (S1-short and S1R), RBD and NTD by ELISA. (C) Binding of isolated antibodies assessed by ELISA to diverse beta-coronavirus prefusion-stabilized spikes (S2P). (D) Neutralization assessment of hybridoma antibodies against SARS-CoV-2 WA-1 and SARS-CoV pseudovirus on 293T-ACE2 cells. See also Figure S1.

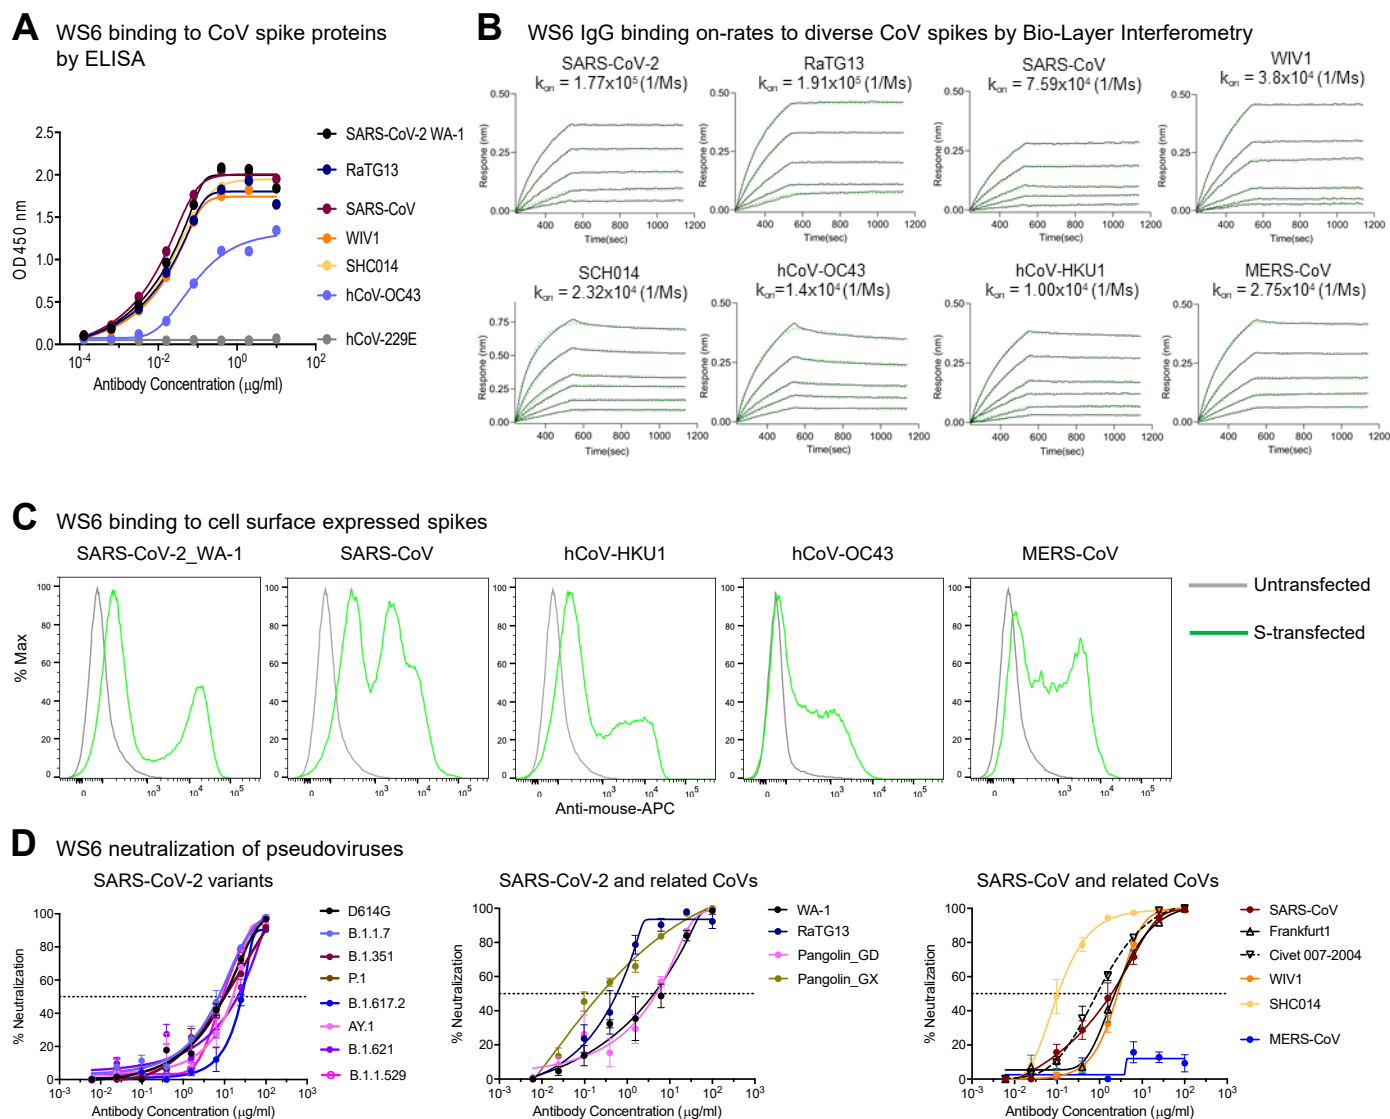

**Figure 2. Antibody WS6 binds and neutralizes diverse beta-coronaviruses.**

(A) ELISA binding analysis of WS6 to prefusion-stabilized soluble spikes of various coronaviruses. (B) BLI binding curves of WS6 with various beta-coronaviruses. (C) WS6 binds cell surface-expressed spike proteins from SARS-CoV-2, SARS-CoV, hCoV-HKU1, hCoV-OC43 and MERS-CoV. (D) WS6 neutralizes SARS-CoV-2 variants, SARS-CoV and related animal coronaviruses. Neutralization activity was measured using spike-pseudotyped lentivirus on 293 flpin-TMPRSS2-ACE2 cells. Assays were performed in triplicate on 293 flpin-TMPRSS2-ACE2 cells, and representative neutralization curves from 2-3 technical replicates are shown. (Left) WS6 neutralizes SARS-CoV-2 variants, D614G, B.1.1.7 (Alpha), B.1.351 (Beta), P.1 (Gamma), B.1.617.2 (Delta), AY.1 (Delta+), B.1.621 (Mu) and B.1.1.529 (Omicron). (Middle) WS6 neutralizes SARS-CoV-2 and related coronaviruses, SARS-CoV-2 WA-1, RaTG13, Pangolin\_GD and Pangolin\_GX. (Right) WS6 neutralizes SARS-CoV and related coronaviruses, SARS-CoV, Frankfurt1, Civet 007-2004, WIV1 and SHC014, but not MERS-CoV. See also Figure S1, S2, S3 and Table S1.

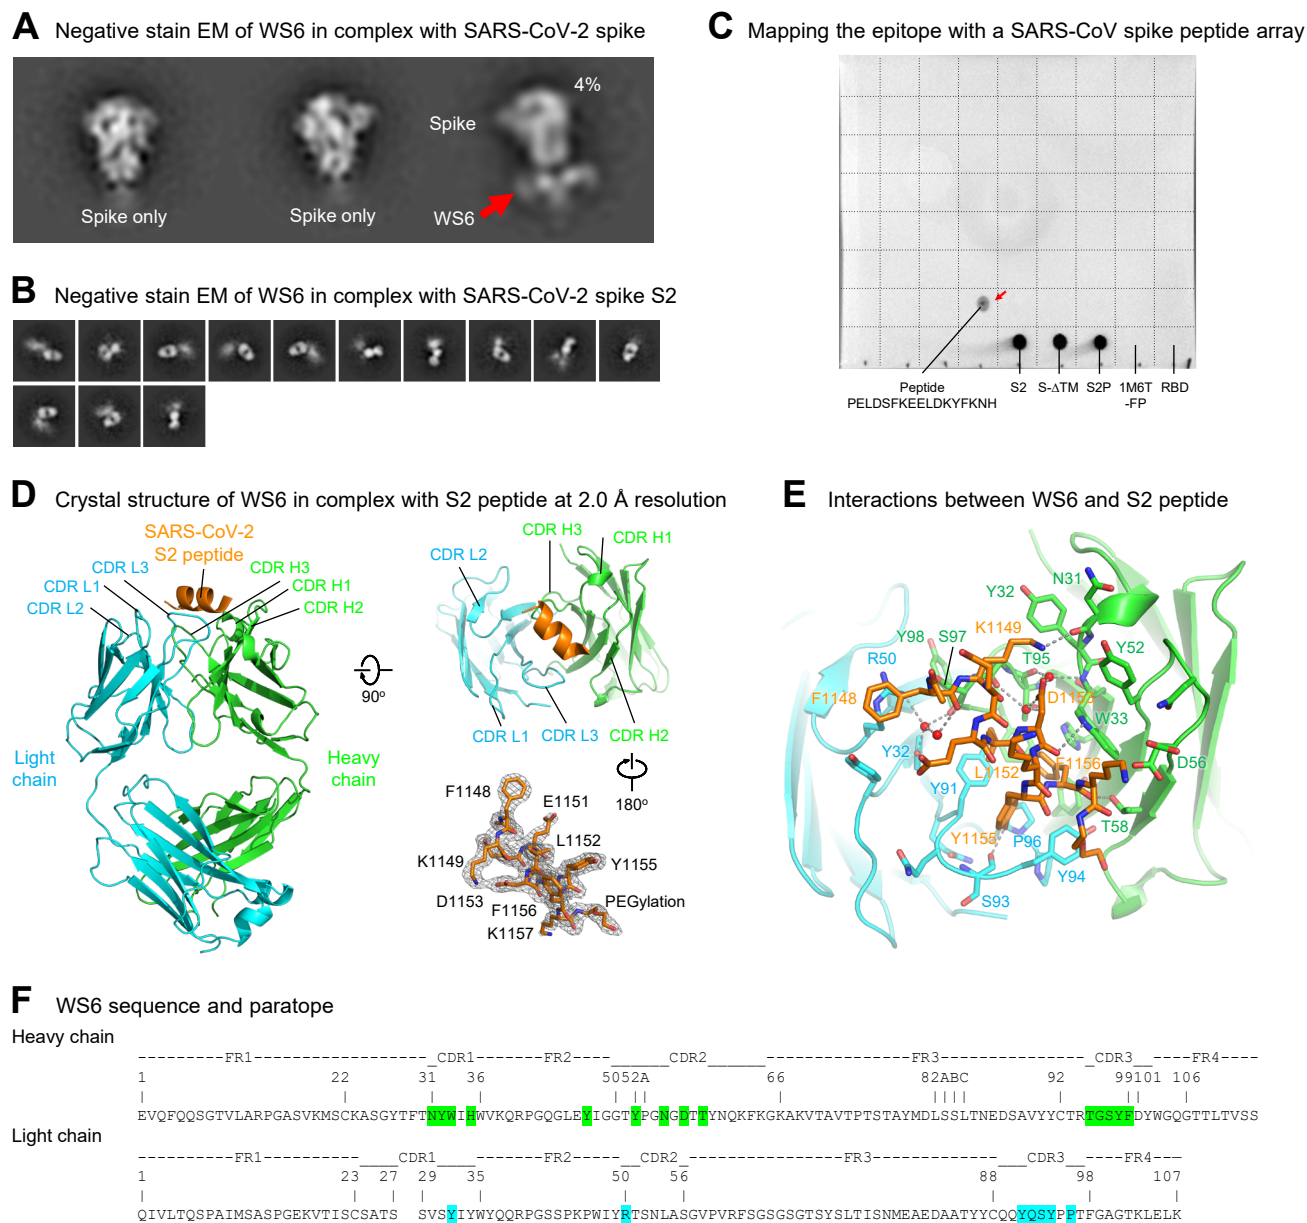

**Figure 3. Epitope mapping and crystal structure of antibody WS6 in complex with S2 peptide.**

(A) Negative stain EM of SARS-CoV-2 spike in complex with WS6. Only a small fraction was observed with WS6 bound at the stem region. (B) Negative stain EM of SARS-CoV-2 spike S2 in complex with WS6. (C) Epitope mapping by dot-blot assay with a SARS-CoV spike peptide array (BEI, NR-52418). WS6 bound to peptide #154 P<sub>1125</sub>ELDSFKEELDKYFKNH<sub>1141</sub> (corresponding to SARS-CoV-2 residues 1143-1159) (red arrow), SARS-CoV-2 spike and its S2 domain. A dash line grid was added on top of the blot to aid display. (D) Crystal structure of WS6 in complex with SARS-CoV-2 S2 peptide at 2.0 Å resolution. The antibody and SARS-CoV-2 peptide are shown in cartoon representation. WS6 heavy chain, light chain and S2 peptide are colored green, cyan and orange, respectively. Two 90°-flipped views were shown (left, top right). Electron density map of the S2 peptide was shown with the antibody interacting residues facing the reader (right, bottom) in a 180°-flipped view from panel above. (E) Detailed interactions between WS6 and S2 peptide. The S2 peptide and paratope residues in WS6 were shown in sticks representation with other regions of WS6 shown in cartoon representation. Hydrogen bonds were indicated with gray dashed lines. Waters that mediating hydrogen bonds were shown as red spheres. (F) Sequence and paratope of WS6. WS6 residues were numbered according to Kabat nomenclature. Heavy and light chain paratope residues were highlighted in green and cyan, respectively. See also Table S3.



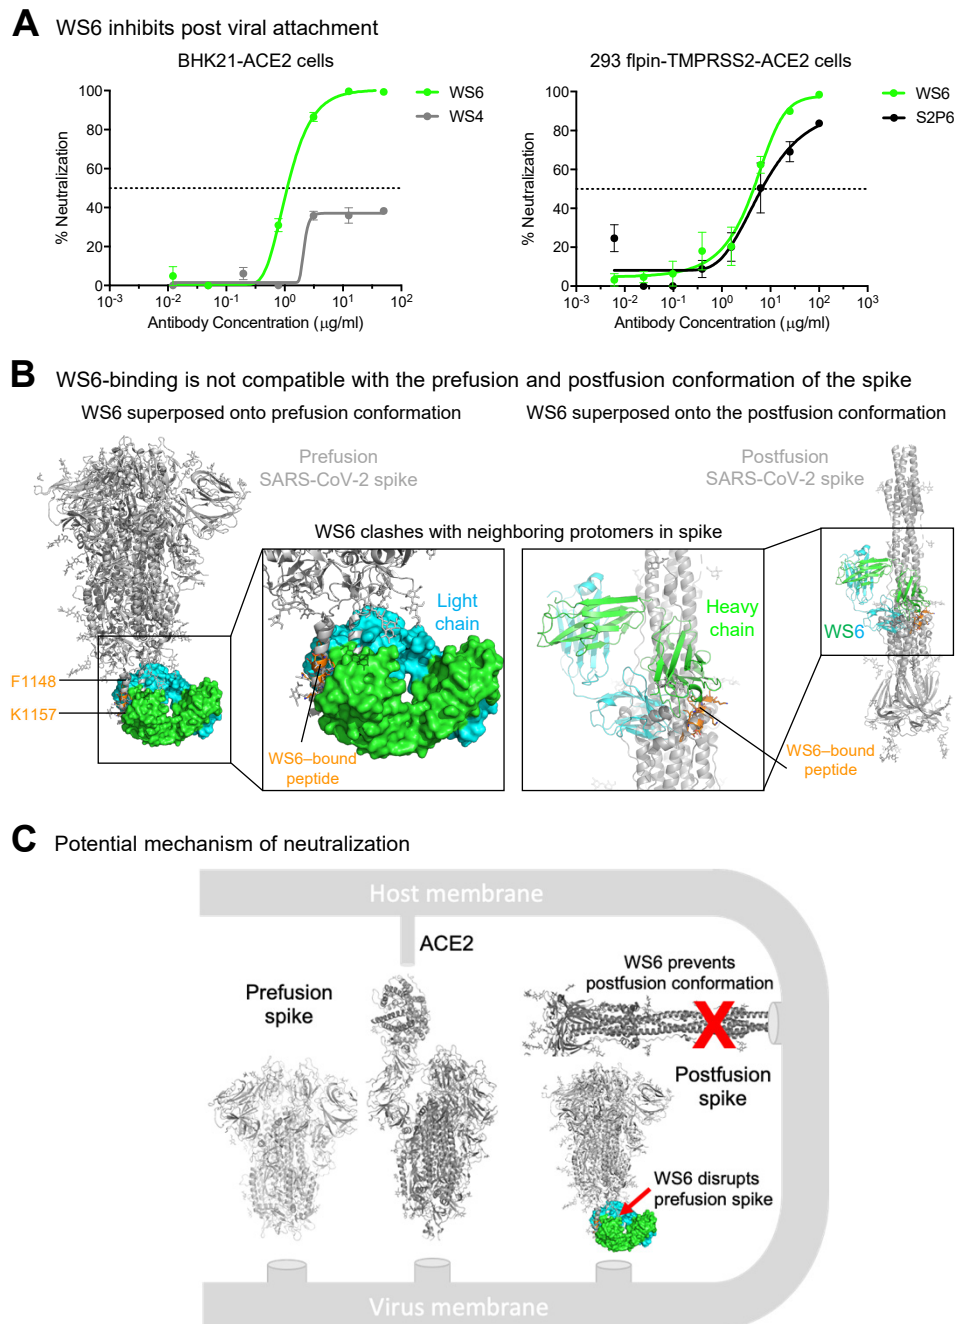

**Figure 4. WS6 neutralizes SARS-CoV-2 by inhibition of post viral attachment.**

(A) WS6 and S2P6 neutralization of SARS-CoV-2 by inhibition of post viral attachment. Neutralization experiments were performed with two BHK21-ACE2 (top) and 293 flpin-TMPRSS2-ACE2 (bottom) cells. WS4, a RBD antibody, was used as a negative control. Representative neutralization curves from two technical replicates of experiments are shown. (B) Binding mode of WS6 is not compatible with the prefusion and postfusion conformation of the spike. The WS6-S2 peptide complex was superposed onto the pre- and post-fusion spike trimer by aligning the WS6-bound S2 peptide with the corresponding part in one of the protomers. S2-bound WS6 clashed with neighboring protomers in either prefusion or postfusion conformation, suggesting binding disrupts prefusion conformation and prevents formation of postfusion. (C) Mechanism of neutralization by WS6. Structure of WS6 in complex with S2 peptide indicated that WS6 disrupts prefusion spike and prevents formation of the postfusion conformation.

**A** Comparison of binding orientations of S2-targeting antibodies

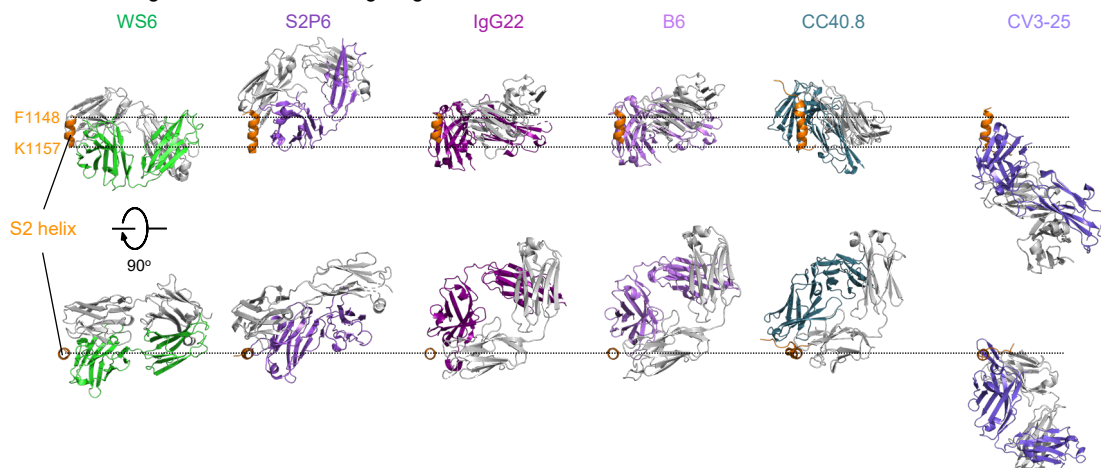

**B** A supersite of vulnerability on the S2 stem

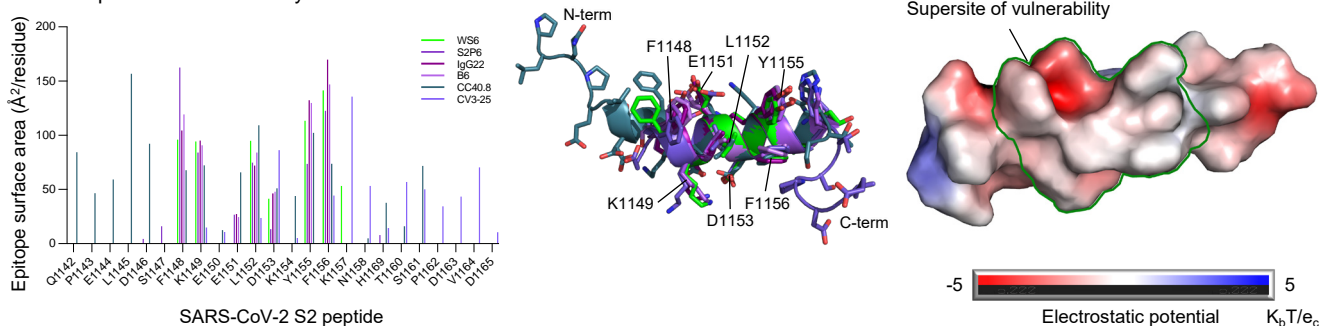

**C** Sequence conservation of the supersite in representative beta-coronaviruses

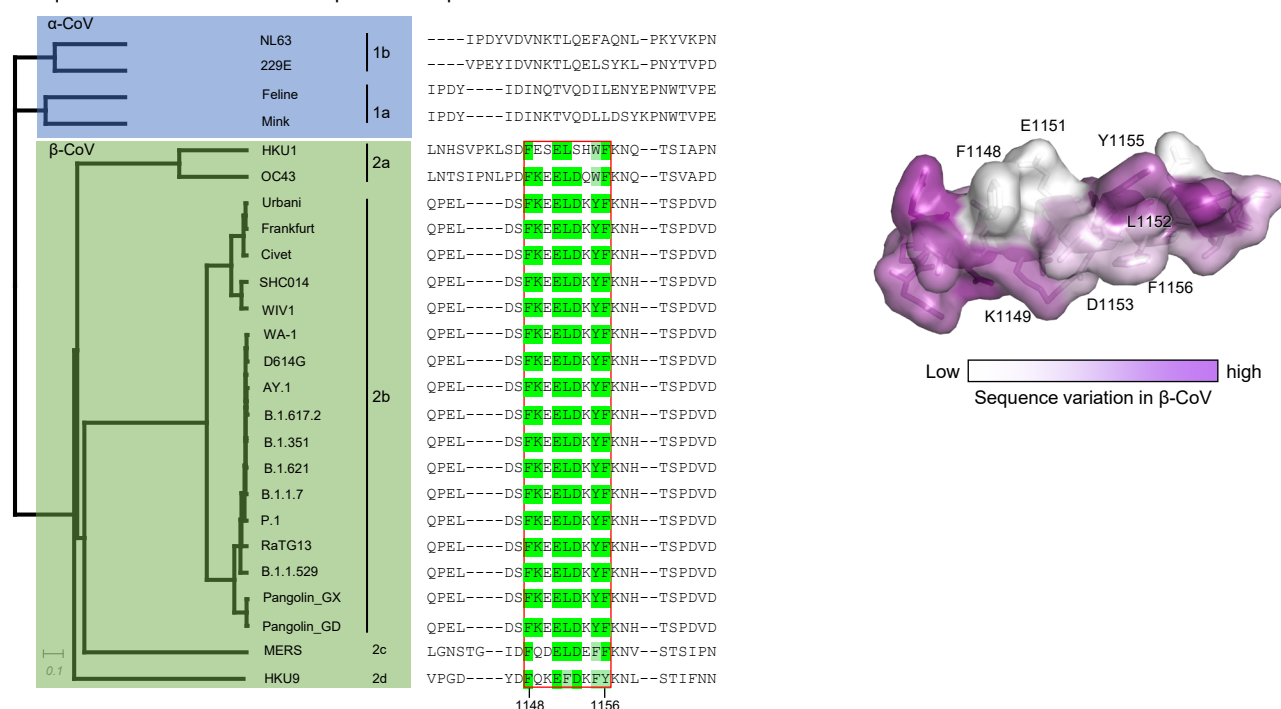

**Figure 5. An S2-stem supersite of vulnerability.**

(A) Comparison of modes of recognition of WS6 with other antibodies targeting the S2 stem helix. WS6 binding to the S2 helix was shown in the same orientation as in Fig. 4B. S2P6, IgG22, B6, CC40.8 and CV3-25 complexes were aligned with the WS6 complex over the S2 peptide helix. The S2 helix and light chains of antibodies were colored orange and gray, respectively. Heavy chains of antibodies are colored differently to distinguish. CV3-25 assumes a distinct mode of recognition comparing to others. (B) Epitopes of antibodies targeting the S2 region define a supersite of vulnerability. Antibody-binding surface areas of each residue in the S2 peptide were plotted along the linear sequence of SARS-CoV-2 S2 peptide (left). Antibody-bound peptides were shown colored by recognizing antibodies. The center region between residues 1148 and 1156 were recognized by most of the antibodies (middle), hydrophobic residues F1148, L1152, Y1155 and F1156 were positioned in the middle of the supersite with K1149, E1151 and D1153 providing hydrophilic interactions are the peripheral (right). The boundary of the supersite, which was defined as residues interacting with 5 of the 6 antibodies analyzed in this study, was highlighted by a green line. (C) Sequence conservation of the SARS-CoV-2 supersite in  $\beta$ -coronaviruses. Sequence dendrogram was calculated using full spike protein sequences (far left). Sequence alignment shown residues 1142 – 1165, recognized by supersite antibodies in panel B (left middle). The surface of S2 peptide was colored by sequence variation score with corresponding residues shown in sticks representation (right). See also Figures S4 and S5.
